# Supplementary material for: DJ-1 Acts as a Scavenger of α-Synuclein Oligomers and Restores Monomeric Glycated α-Synuclein
Source: MDPI journal article supplement (doi:10.3390/biom11101466), 2021-10-06
Supplement: s1 [file s1]

**Supplementary Materials for**

**DJ-1 acts as a scavenger of  $\alpha$ -synuclein oligomers and  
restores monomeric glycated  $\alpha$ -synuclein**

Tamr B. Atieh, Jonathan Roth, Xue Yang, Cody L. Hoop, and Jean Baum \*

Department of Chemistry and Chemical Biology, Rutgers University, Piscataway, New  
Jersey 08854

\* Corresponding author: Jean Baum; Dept. of Chemistry and Chemical Biology, Rutgers  
University, 123 Bevier Rd., Piscataway, NJ 08854; Tel.: 848-445-5284; Email:  
jean.baum@chem.rutgers.edu

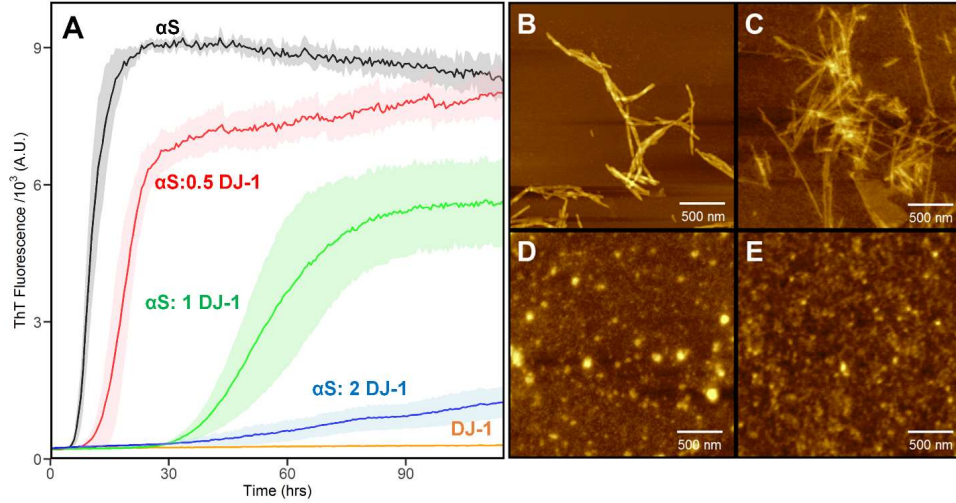

**Figure S1. Impact of DJ-1 on native ac- $\alpha$ Syn amyloid formation.** (A) ThT fluorescence of 70  $\mu$ M native ac- $\alpha$ Syn alone (black) or in the presence of increasing concentrations of oxidized DJ-1 (dimer concentrations- 35  $\mu$ M, red; 70  $\mu$ M, green; or 140  $\mu$ M, blue). ThT fluorescence of DJ-1 alone is shown in orange. Addition of DJ-1 to native ac- $\alpha$ Syn extends the lag time from 5–10 hours in the absence of DJ-1 to 20–50 hours with 35–70  $\mu$ M DJ-1. At 140  $\mu$ M DJ-1, ac- $\alpha$ Syn fibrillization is completely inhibited in this time regime. These results are consistent with and supports previous work, which shows that DJ-1 suppresses amyloid formation of  $\alpha$ Syn [51,52,53]. (B–E) AFM images of (B) ac- $\alpha$ Syn alone, (C–D) ac- $\alpha$ Syn incubated with DJ-1 in a (C) 1:1 or (D) 1:2 molar ratio of ac- $\alpha$ Syn monomer to DJ-1 dimer, respectively, or (E) DJ-1 alone, taken from the end of the ThT fluorescence assay. ac- $\alpha$ Syn fibrils are observed in the absence of DJ-1 (B) and with substoichiometric concentrations of DJ-1 (C). However, ac- $\alpha$ Syn fibrils are less prevalent with higher concentrations of DJ-1 (D), supporting amyloid inhibition. AFM images were acquired in air using a Park NX-10 AFM. 20  $\mu$ L of sample were deposited on a 1 cm  $\times$  1 cm freshly cleaved mica and incubated for 10 minutes. Samples were then washed with 200  $\mu$ L water to remove excess salt and unbound protein and allowed to dry for 1 hour before imaging. AFM images were processed using Gwyddion software.

*Assessing methylglyoxyl-mediated glycation of N-terminally acetylated  $\alpha$ -synuclein.*

To determine if glycated N-terminally acetylated  $\alpha$ -synuclein (glyc-ac- $\alpha$ Syn) was produced from reaction with methylglyoxyl (MGO), we assayed the chemical composition and aggregation propensity of the MGO-glycated ac- $\alpha$ Syn. By reacting ac- $\alpha$ Syn with MGO, we detect glycation as evidenced by a visual change in color from a colorless to brown solution along with an increase in absorbance from ~300–500 nm relative to untreated ac- $\alpha$ Syn in a UV-Vis absorbance wavelength scan (**Figure S2A**). Further attempts to isolate the monomer via size exclusion chromatography (SEC) reveal that glyc-ac- $\alpha$ Syn contains an intrinsic population of oligomeric species not present in untreated ac- $\alpha$ Syn (**Figure S2B**). These oligomers, however, do not propagate into amyloid fibrils, as evaluated by the lack of Thioflavin T (ThT) fluorescence of glyc-ac- $\alpha$ Syn within 80 hours (**Figure S2C**). This is consistent with previous studies, which show that glycation of  $\alpha$ Syn abrogates amyloid formation [10,32]. By contrast, untreated ac- $\alpha$ Syn forms filamentous fibrils with heights ranging from 5–15 nm with various lengths up to 2  $\mu$ m (**Figure S1B**).

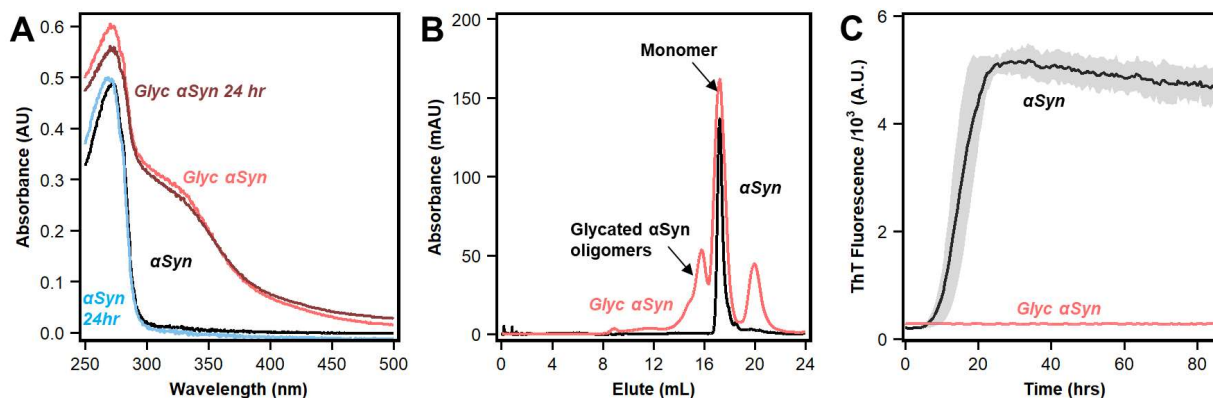

**Figure S2. Characterization of glyc-ac- $\alpha$ Syn.** (A) UV-Vis spectra of fresh native ac- $\alpha$ Syn (black), fresh glyc-ac- $\alpha$ Syn (red), and native (blue) and glyc-ac- $\alpha$ Syn (dark red) after incubation at room temperature for 24 hrs. The glycation of ac- $\alpha$ Syn results in a striking increase in absorbance between 300–500 nm. Incubation of ac- $\alpha$ Syn, which increases production of oligomers, does not perturb the UV-Vis profile of native ac- $\alpha$ Syn or glyc-ac- $\alpha$ Syn. (B) Size exclusion chromatograms of native (black) and glyc-ac- $\alpha$ Syn (red). Both samples show a sharp monomer peak near 17 mL elution time. However, glyc-ac- $\alpha$ Syn displays a peak between 13–16 mL, indicating existence of intrinsic oligomers. (C) ThT fluorescence curves of native ac- $\alpha$ Syn (black) show characteristic fibril formation, while glycation of ac- $\alpha$ Syn (red) abolishes amyloid aggregation.

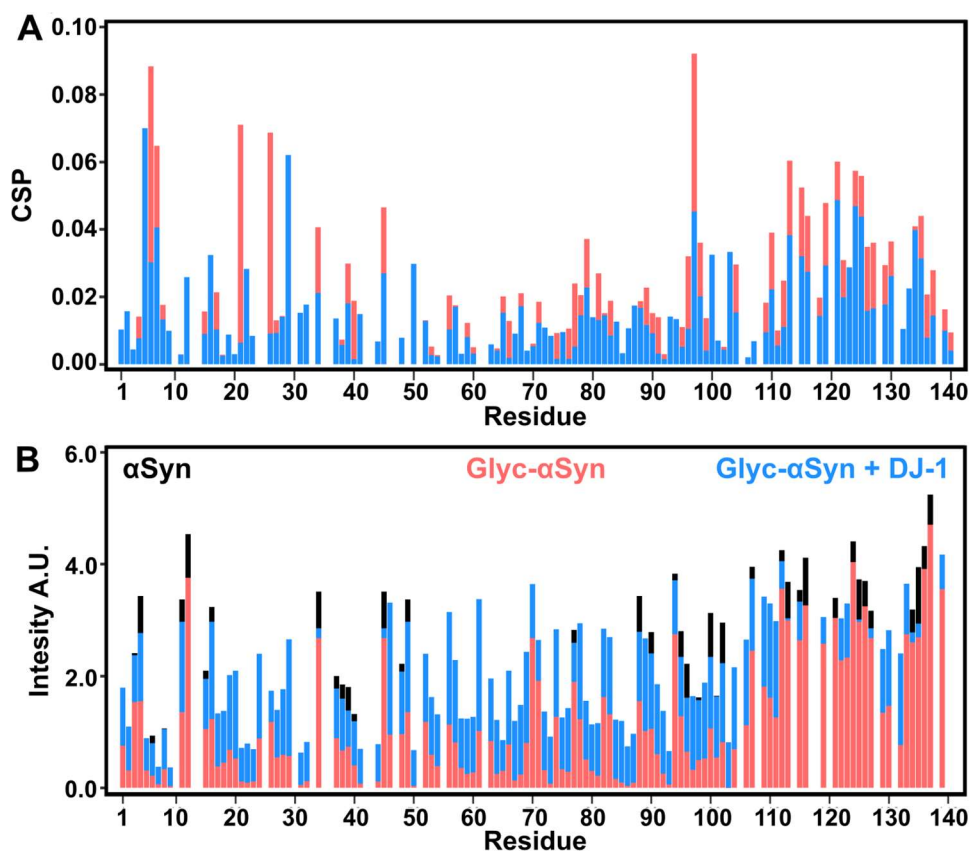

**Figure S3. DJ-1 restores native-like features in  $^1\text{H}$ - $^{15}\text{N}$  HSQC spectra.** (A) Combined chemical shift perturbations of glyc-ac- $\alpha\text{Syn}$  in the presence (blue) or absence (red- reproduced from Fig. 1E) of DJ-1 relative to native ac- $\alpha\text{Syn}$ . Chemical shift changes incurred by glycation are reduced, but not fully recovered upon addition of DJ-1, consistent with ac- $\alpha\text{Syn}$  remaining glycosylated even in the presence of DJ-1. (B) Per-residue peak intensities of native ac- $\alpha\text{Syn}$  (black), glyc-ac- $\alpha\text{Syn}$  in the absence of DJ-1 (red), or glyc-ac- $\alpha\text{Syn}$  in the presence of DJ-1 (blue). Peak intensities largely recover with DJ-1 present in the sample.

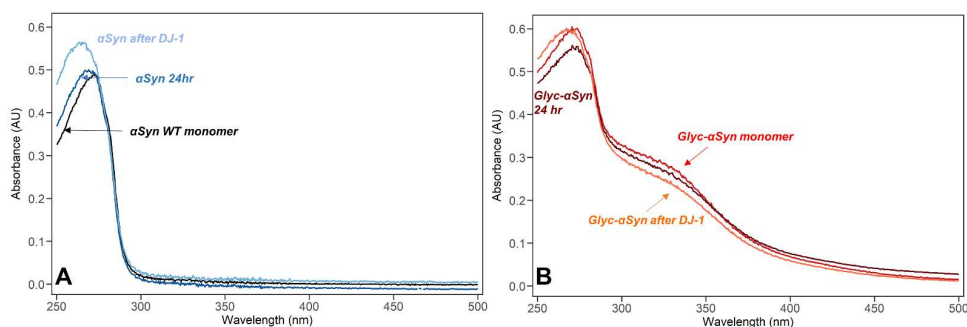

**Figure S4. Incubation with DJ-1 does not deglycate ac- $\alpha\text{Syn}$ .** (A) UV-Vis wavelength profiles of fresh native ac- $\alpha\text{Syn}$  monomer (black), after incubation at room temperature for 24 hr (blue), or upon incubation with DJ-1 (light blue). All show a consistent wavelength profile with the maximum absorbance near 280 nm. (B) Freshly glycosylated ac- $\alpha\text{Syn}$  monomer (red) shows increase in absorbance from 300 to 500 nm, relative to native ac- $\alpha\text{Syn}$ , indicative of modification induced by glycation. The absorbance at these wavelengths remains unchanged after incubation at room temperature for 24 hr (dark red) or upon incubation with DJ-1 (orange).

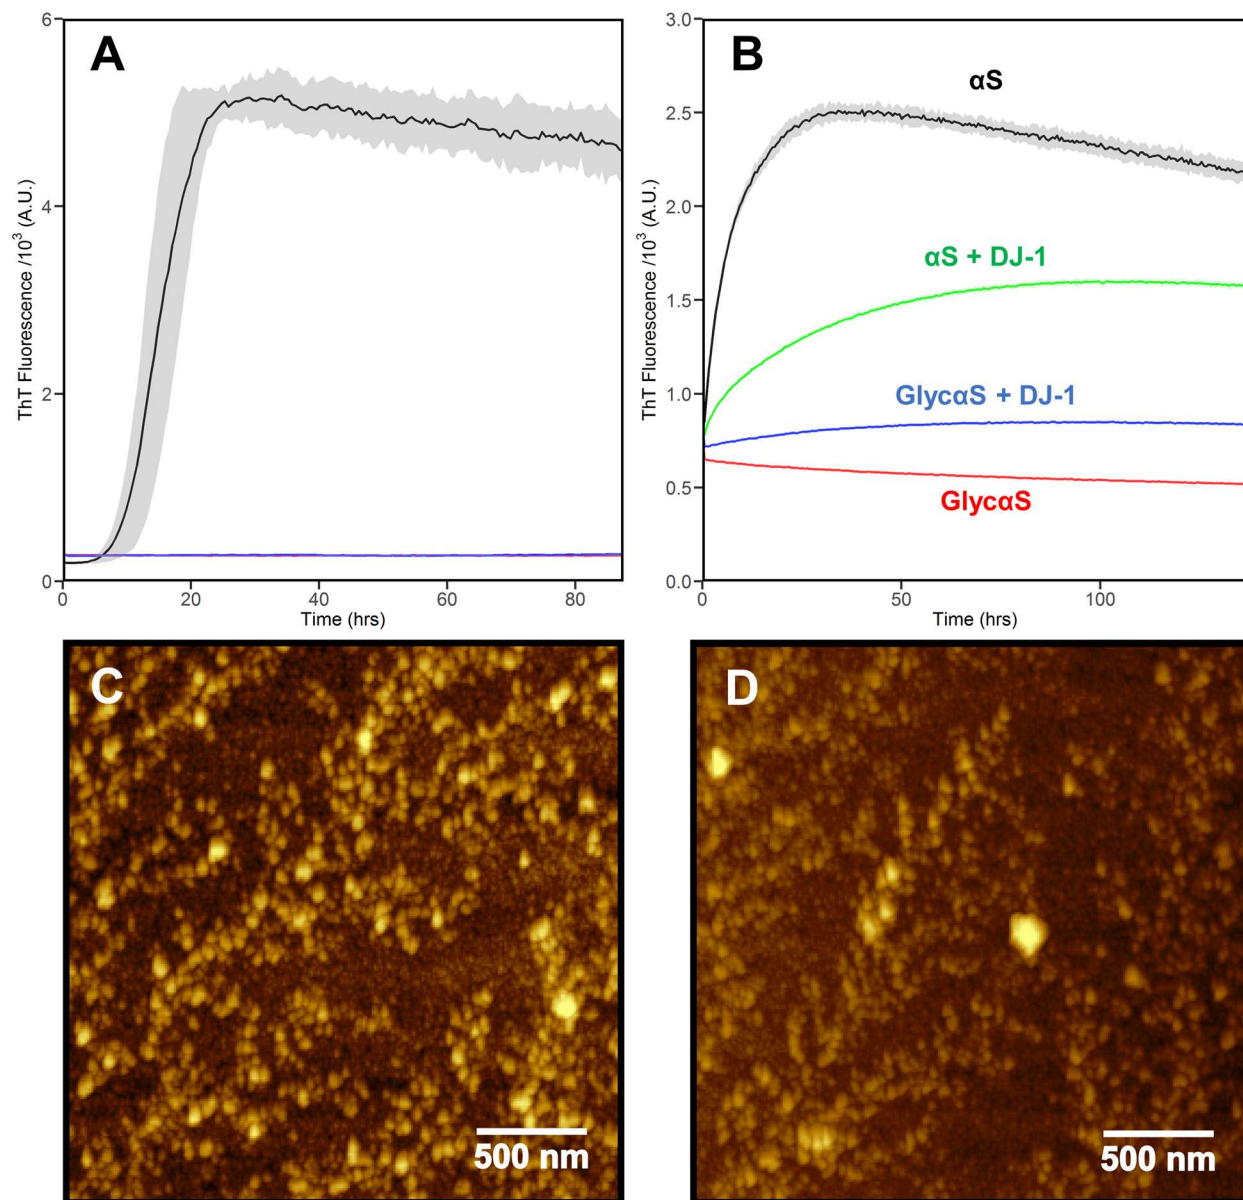

**Figure S5. Impact of ac- $\alpha$ Syn glycation on amyloid formation.** (A) ThT fluorescence of 70  $\mu$ M native ac- $\alpha$ Syn (black) shows a sigmoidal increase in fluorescence intensity, characteristic of amyloid fibril formation. Glyc-ac- $\alpha$ Syn (70  $\mu$ M; red) does not show any increase in ThT fluorescence intensity, indicating no amyloid formation. Glyc-ac- $\alpha$ Syn (70  $\mu$ M) incubated with 35  $\mu$ M DJ-1 (blue) shows that DJ-1 does not rescue the fibrillization propensity of glyc-ac- $\alpha$ Syn, supporting that deglycation does not occur. DJ-1 was removed from the reaction before performing ThT fluorescence measurements. Assays were performed with 70  $\mu$ M native or glyc-ac- $\alpha$ Syn monomer with agitation. (B) ThT fluorescence assays under fibril seeding, quiescent conditions. (Black) Native ac- $\alpha$ Syn monomer (70  $\mu$ M) with 5  $\mu$ M fibril seeds; (green) native ac- $\alpha$ Syn monomer (70  $\mu$ M) with 5  $\mu$ M fibril seeds in the presence of 20  $\mu$ M DJ-1; (red) glyc-ac- $\alpha$ Syn monomer (70  $\mu$ M) with 5  $\mu$ M native ac- $\alpha$ Syn fibril seeds; and (blue) glyc-ac- $\alpha$ Syn monomer (70  $\mu$ M) with 5  $\mu$ M native ac- $\alpha$ Syn fibril seeds in the presence of 20  $\mu$ M DJ-1. DJ-1 suppresses the amyloid growth of native ac- $\alpha$ Syn (green). ThT fluorescence is not observed for glyc-ac- $\alpha$ Syn even in the presence of native ac- $\alpha$ Syn fibril seeds (red), indicating that glyc-ac- $\alpha$ Syn does not template onto native fibril seeds. The addition of DJ-1 to glyc-ac- $\alpha$ Syn (blue) is unable to rescue this cross seeding. All ThT fluorescence assays were performed in PBS, pH 7.4 at 37°C. (C–D) In air AFM image of (C) glyc-ac- $\alpha$ Syn and (D) glyc-ac- $\alpha$ Syn in the presence of DJ-1 at the end point of the ThT assay upon seeding with native ac- $\alpha$ Syn fibrils. No amyloid fibrils are observed for glyc-ac- $\alpha$ Syn in the presence or absence of DJ-1. In air AFM conditions were prepared the same as in Figure S1.

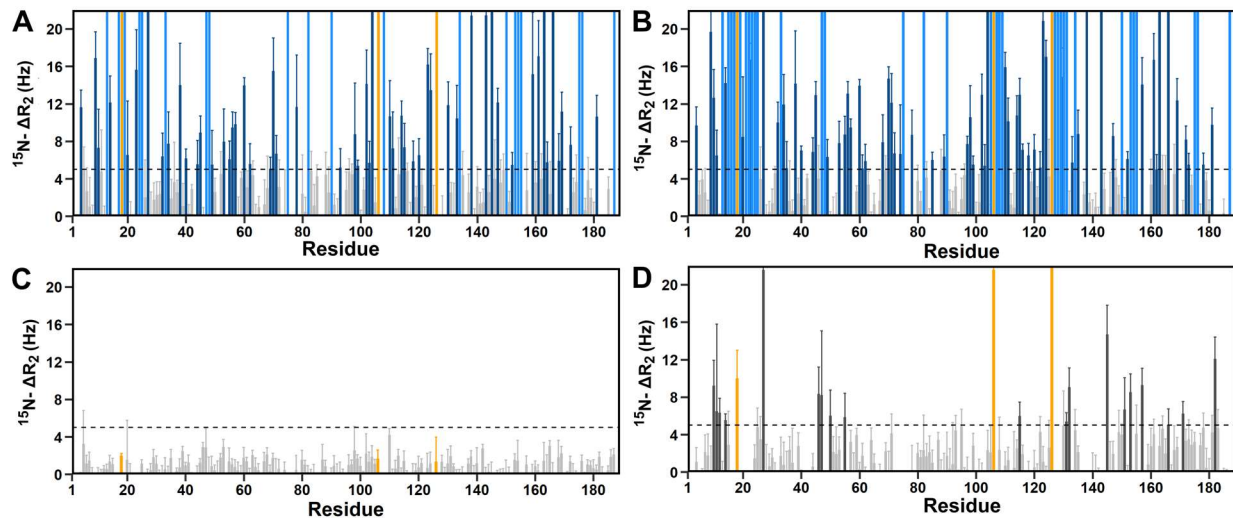

**Figure S6. Supporting the DJ-1 catalytic site as the binding site for ac- $\alpha$ Syn.** (A–B) Per-residue  $^{15}\text{N}$ - $\Delta R_2$  of  $^{15}\text{N}$  DJ-1 in the presence relative to in the absence of native ac- $\alpha$ Syn with (A) 0 hours or (B) 24 hours of pre-incubation at room temperature, showing enhanced  $R_2$  values (dark blue) or peak broadening beyond detection (light blue) at specific residues. Orange indicates the catalytic triad, of which all residues are broadened beyond detection. (C) Per-residue  $^{15}\text{N}$ - $\Delta R_2$  of  $^{15}\text{N}$ -DJ-1/C106A in the presence relative to in the absence of native ac- $\alpha$ Syn. Minimal changes in  $R_2$  in DJ-1/C106A indicate that Cys106 in the catalytic triad is critical for DJ-1–ac- $\alpha$ Syn interactions. (D) Per-residue  $^{15}\text{N}$ - $\Delta R_2$  of  $^{15}\text{N}$ -DJ-1 in the presence relative to in the absence of native ac- $\alpha$ Syn in non-oxidizing conditions. Substantial increases in  $R_2$  in specific residues in non-oxidizing conditions may result from low, but detectable amounts of oxidized DJ-1 (5% by ESI mass spec, data not shown) present after purification. All  $^{15}\text{N}$ - $R_2$  measurements were performed at 700 MHz  $^1\text{H}$  Larmor frequency at 25°C in PBS, pH 7.4.



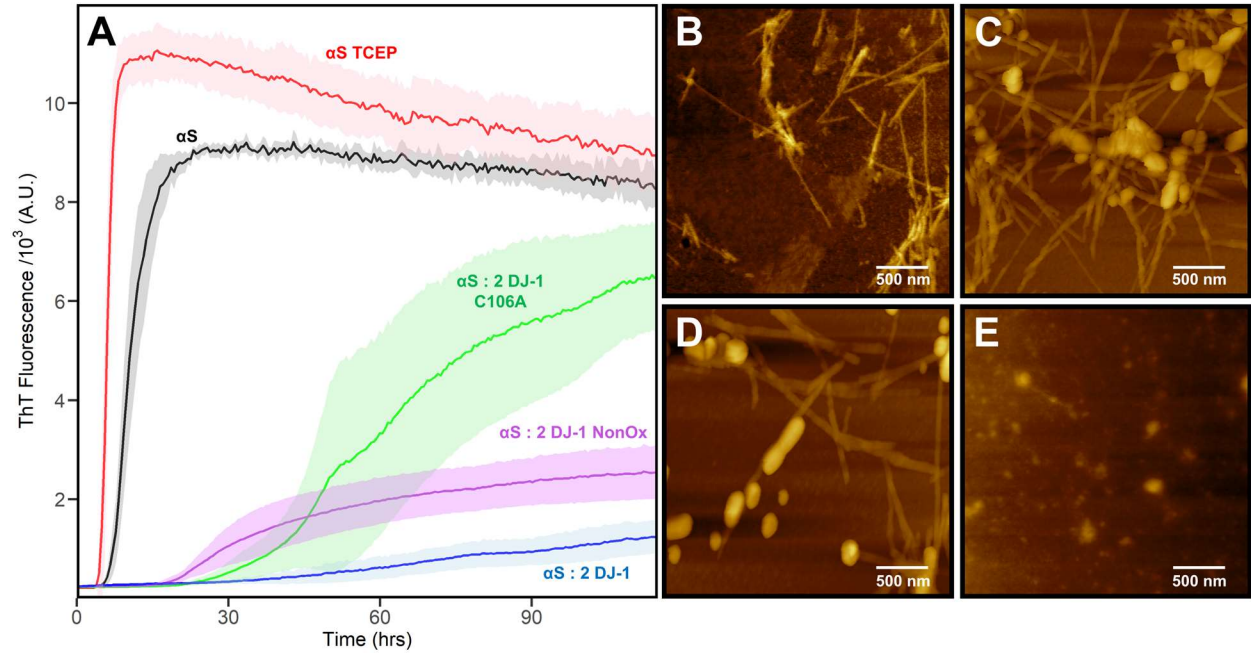

**Figure S7. Impact of the DJ-1 catalytic triad on ac- $\alpha$ Syn amyloid formation.** (A) ThT fluorescence of (black) native ac- $\alpha$ Syn (70  $\mu$ M) alone, (red) in the presence of a reducing agent, TCEP, (blue) with addition of 2 molar equivalents of oxidized DJ-1 dimer (140  $\mu$ M dimer; reproduced from **Fig. S1A**), (magenta) with 2 molar equivalents of DJ-1 dimer and TCEP, and (green) with 2 molar equivalents of DJ-1/C106A dimer. All reactions were assayed in 20 mM sodium phosphate buffer, 100 mM NaCl, at pH 7.4, with 20  $\mu$ M ThT. All samples (100  $\mu$ l) were loaded in a 96-well plate with a single Teflon bead in each well, and the plates were shaken at 600 rpm at 37°C for over 100 hours using a POLAR Star Omega fluorimeter to monitor the fluorescence intensity over time. Oxidized DJ-1 is shown to inhibit ac- $\alpha$ Syn amyloid formation at this stoichiometry. By co-incubating ac- $\alpha$ Syn with non-oxidized DJ-1 (addition of a reducing agent or DJ-1/C106A that eliminates the catalytic cysteine), ac- $\alpha$ Syn amyloid formation is delayed by lengthening of the lag time. However inhibition is not as effective as in the presence of oxidized, intact DJ-1. Thus, the presence of C106 and its oxidation state are critical for the DJ-1–ac- $\alpha$ Syn interaction and suppression of ac- $\alpha$ Syn amyloid formation. (B) In air AFM image of ac- $\alpha$ Syn with TCEP that shows similar morphology to native ac- $\alpha$ Syn fibrils. (C) AFM image of ac- $\alpha$ Syn with DJ-1/C106A showing the presence of amyloid fibrils. (D) In air AFM image of ac- $\alpha$ Syn and non-oxidized DJ-1 confirming amyloid fibril formation is not inhibited by the non-oxidized DJ-1. (E) In air AFM image of ac- $\alpha$ Syn and DJ-1 oxidized confirming the complete inhibition of amyloid fibril formation when DJ-1 is properly oxidized. AFM samples were prepared in the same way as **Figure S1**.

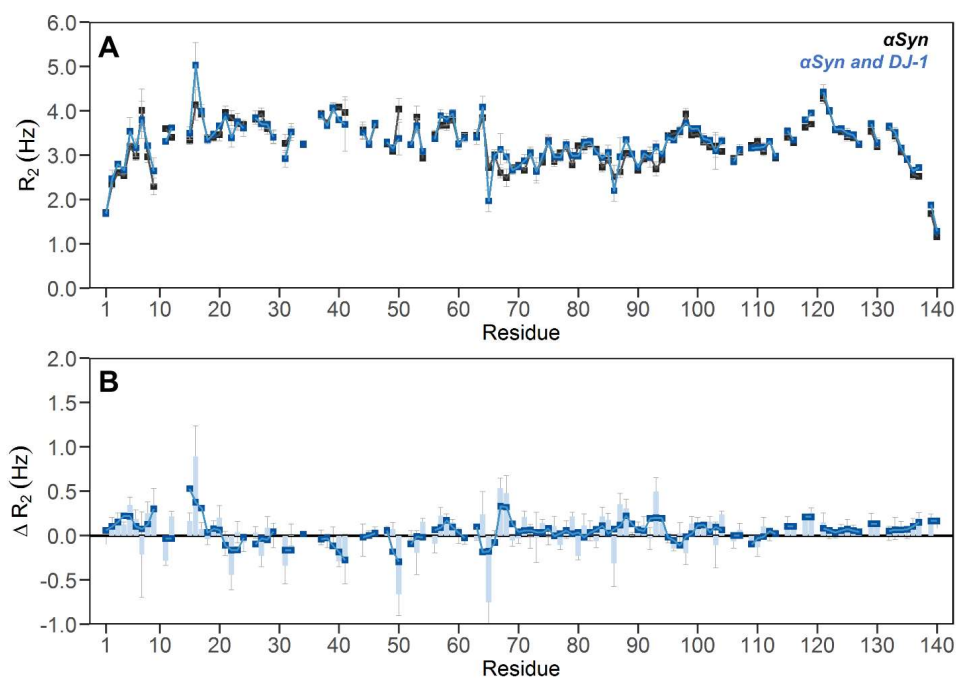

**Figure S8. Impact of DJ-1 on ac- $\alpha\text{Syn}$  monomers.** (A) Per-residue  $^{15}\text{N}$ - $R_2$  values of  $^{15}\text{N}$ -native ac- $\alpha\text{Syn}$  (250  $\mu\text{M}$ ) in the absence (black) or presence of 500  $\mu\text{M}$  DJ-1 (blue). (B) Per-residue  $\Delta R_2$  values determined by subtracting the  $^{15}\text{N}$ - $R_2$  values of native ac- $\alpha\text{Syn}$  in the absence of DJ-1 from those in the presence of DJ-1 (data plotted in A). Connected points in darker blue represent a three-point average and are drawn to guide the eye. The minimal changes in  $^{15}\text{N}$ - $R_2$  for the ac- $\alpha\text{Syn}$  monomer suggest that the ac- $\alpha\text{Syn}$  monomer does not have a detectable interaction with DJ-1.  $^{15}\text{N}$ - $R_2$  measurements were acquired at 700 MHz  $^1\text{H}$  Larmor frequency at 15°C in PBS, pH 7.4.
